1 **Chicken uric acid elimination via the uric acid transporters BCRP and MRP4 in the**  
2 **liver, kidneys, and intestines**

3

4 Xuedong Ding, Manman Li, Shoufa Qian, Yuying Ma, Tianyi Fang, Xinlu Li,  
5 Huan Liu, Shibin Feng, Yu Li, Xichun Wang, Jinchun Li, and Jinjie Wu\*

6 *College of Animal Science and Technology, Clinical Veterinary Medicine, Anhui Agricultural*  
7 *University, 130 West Changjiang Road, Hefei 230036, China*

8

9 **Running title:** Chicken uric acid elimination via BCRP and MRP4

10

11 \*Corresponding author: Jinjie Wu. Tel: +86-13505514926; Email: [wjj@ahau.edu.cn](mailto:wjj@ahau.edu.cn) (J. J.

12 Wu)

13

14

15

16

17 **Abstract**

18 Breast cancer resistance protein (BCRP) and multidrug resistance protein 4 (MRP4) are  
19 involved in uric acid excretion in humans and mice. Despite evidence suggesting that chicken  
20 renal proximal tubular epithelial cells participate in uric acid secretion, the roles of BCRP and  
21 MRP4 in chickens remain unclear. This study evaluated the relationship between chicken  
22 BCRP and MRP4 expression and renal function in the liver, kidneys, and intestines. Sixty  
23 20-day-old Isa brown laying hens were randomly divided into four groups: a control group  
24 (NC) and groups provided with sulfonamide-treated drinking water (SD), a diet  
25 supplemented with fishmeal (FM), and an intraperitoneal injection of uric acid (IU). Serum  
26 uric acid, creatinine, and blood urea nitrogen (BUN) levels were significantly higher in the  
27 SD and IU groups than in the NC group. BCRP and MRP4 levels in the SD and IU groups  
28 were significantly increased in the kidneys and ileum and decreased in the liver. In the FM  
29 group, BCRP and MRP4 were significantly increased in the kidneys and slightly increased in  
30 the ileum. These results demonstrate that chicken BCRP and MRP4 are involved in renal and  
31 intestinal uric acid excretion. When renal function is impaired, serum uric acid increased and  
32 BCRP and MRP4 in the liver, kidneys, and ileum exhibit compensatory increases; when renal  
33 function is normal, serum uric acid changes have no effect on ileum BCRP and MRP4  
34 expression. Therefore, this study may provide the references to the uric acid regulation in  
35 human.

36 *Key words: uric acid, BCRP, MRP4, chicken*

37

38

## 39 **Introduction**

40 Uric acid (urate) is the final product of purine metabolism. Although in some cases, dietary  
41 [39], genetic [15, 24], or disease-related [13] uric acid overproduction is the basis of  
42 hyperuricemia, the main cause, in fact, of hyperuricemia is reduced uric acid excretion [23,  
43 30]. In an analysis of uric acid metabolism in 65 patients with hyperuricemia, six (9.2%)  
44 exhibited an overproduction phenotype, 52 (80.0%) exhibited an underexcretion phenotype,  
45 and seven (10.8%) exhibited a mixed phenotype [23]. The kidney is the main organ  
46 responsible for uric acid excretion, accounting for approximately two-thirds of the total uric  
47 excretion in the body; the remaining one-third mainly involves the intestines [16]. This  
48 process involves several uric acid transporters; breast cancer resistance protein (BCRP;  
49 ABCG2) and multidrug resistance protein 4 (MRP4; ABCC4) are the major proteins involved  
50 in uric acid excretion and expression in the human liver, kidneys, and intestines [12, 18, 25,  
51 31]. BCRP is a high-capacity uric acid transporter that physiologically mediates renal and  
52 extra-renal (intestinal) uric acid excretion; its dysfunction leads to hyperuricemia [19].  
53 Extensive data indicates that BCRP plays an important role in intestinal uric acid excretion in  
54 mice and humans [11]. Renal uric acid excretion is significantly reduced after nephrectomy in  
55 mice, while serum uric acid does not change and ileum BCRP expression is significantly  
56 increased [37]. Therefore, alterations in intestinal BCRP may serve as a compensatory  
57 mechanism. When renal uric acid excretion is reduced, intestinal uric acid excretion is  
58 increased to maintain the uric balance.

59 Many studies have examined the functions of human, rat, and mouse BCRP in the kidneys  
60 and intestines; however, relatively few studies have evaluated MRP4. Similar to BCRP,  
61 MRP4 is a uric acid unidirectional efflux pump with multiple allosteric substrate binding sites,  
62 which is expressed in the apical membrane of human renal proximal tubules [32]. It is  
63 responsible for uric acid excretion by transporting uric acid from tubular epithelial cells into  
64 renal tubule lumens. MRP4 is also expressed in the basal membrane of human hepatocytes  
65 and is involved in the transport of uric acid in the liver [27]. In HEK293 cells, MRP4 can  
66 transport uric acid concurrently with cAMP or cGMP and uric acid excretion increases with  
67 the overexpression of MRP4 [31].

68 Uricase in the mouse liver can convert uric acid into allantoin; however, human and

69 chicken livers lack uricase [35]. Accordingly, uric acid metabolism in humans occurs via a  
70 different mechanism than in mice. Therefore, the chicken may constitute a more useful model  
71 than mice for studying human uric acid transporters. In vitro studies have demonstrated the  
72 presence of active urate secretion in chicken renal proximal tubular epithelial cells (cPTCs)  
73 and this may be related to multiple uric acid transporters [8]. Subsequently, Bataille et al. [2]  
74 showed that BCRP and MRP4 are expressed in cPTCs and that uric acid secretion is reduced  
75 by 60–70% in response to a 75% reduction in chicken *Mrp4* expression by short hairpin RNA  
76 interference. The net transepithelial transport of uric acid decreases when *BCRP* is knocked  
77 down [3], though the change is not significant, indicating that MRP4 is the main route for  
78 urate secretion in chicken proximal tubules. However, the roles of BCRP and MRP4 in  
79 chicken uric acid excretion remain unclear. Therefore, the aim of this study was to investigate  
80 the relationship between serum uric acid levels and BCRP and MRP4 levels in the liver,  
81 kidneys, and intestines and to evaluate kidney and extrarenal uric acid excretion in chickens.  
82 These findings may lay the foundation for the treatment and prevention of hyperuricemia.

### 83 **Materials and methods**

#### 84 *Animal grouping and Treatment*

85 Seventy female 1-day-old Isa brown laying hens were purchased from Anhui Poultry  
86 Industry Co., Ltd. (China), all chickens were reared in cages and allowed ad libitum  
87 consumption of feed and water. The room temperature was 25~30°C. The diets compositions  
88 were arranged based on National Research Council (1994) recommended requirements and  
89 diet containing 204.3 g/kg of crude protein, 11.5 g kg<sup>-1</sup> of calcium, 4.2 g/kg of phosphorus  
90 and 12.11 MJ/kg of ME. On the 20st day, sixty healthy chicken were adopted and randomly  
91 divided into four groups (n = 15 per group, weight 189.3 ±13.8 g). The normal control group  
92 (NC) was fed the basal diet; the sulfonamide drug group (SD) was fed the basal diet, and the  
93 sulfamonomethoxine sodium soluble powder was added to the drinking water (8 mg/L/d); the  
94 fish meal group (FM) was added 16% fishmeal in the basal diet (crude protein 27.6%); the

95 injection uric acid group (IU) was fed on the basal diet and received uric acid 250 mg/kg/d  
96 (suspended in 0.5% CMC-Na solution) by intraperitoneally injected. The experiment was  
97 lasted for 3 weeks, on the 41st day, the blood were collected from jugular vein after fasting  
98 for 12 h. After clot for approximately 30 min at room temperature, the blood was centrifuged  
99 at 3,500 g/min for 10 min to obtain serum. The collected serum was stored at -20°C. Finally  
100 all chickens were killed by decapitation. The liver, kidney, jejunum, and ileum were collected  
101 and stored in 4% paraformaldehyde and liquid nitrogen for testing. All experimental  
102 procedures for the care and use of animals in the present study were approved by the Animal  
103 Care Committee of Anhui Agricultural University.

#### 104 *Instruments and Reagents*

105 Automated biochemical analyzer (Beckman AU680, USA), Electrophoresis apparatus  
106 (Tanon, China), Cryogenic centrifuge (TGL-18R, China), Microscope (Olympus CX31,  
107 Japan), ChemiDoc Imaging System (Bio-Rad, USA), RNA Concentration analyzer (NanoVue  
108 plus, Thermo, USA), Real-time Quantitative PCR (Thermo, USA), RIPA cell lysate  
109 (Biosharp, China), Protein phosphatase inhibitor (Solarbio, China), BCA protein  
110 concentration assay kit (Biosharp, China), Sulfamonomethoxine Sodium soluble powder  
111 (Shijiazhuang City Hengxin Pharmaceutical Co., Ltd. China), Uric acid (BioXtra, ≥ 99%  
112 HPLC, Sigma, USA), Sodium carboxymethyl cellulose (CMC-Na, Solarbio, China), Defatted  
113 fish meal (Crude protein ≥65%, China ).

#### 114 *Serum uric acid, creatinine and blood urea nitrogen (BUN) Levels*

115 The serum uric acid, creatinine and BUN levels was measured using an automatic  
116 biochemical analyzer.

117 *Real-time Quantitative PCR (qPCR)*

118 Total RNA was extracted from liver, kidney, jejunum, and ileum (100 mg). And 500 ng  
119 total RNA was reverse transcribed from each sample. QPCR reaction program was as  
120 follows.: 95°C, 02 min; 95°C, 15 s; 60°C, 1 min (40 cycles); 60°C, 30 s; 60°C ~ 95°C, 0.2°C  
121 s<sup>-1</sup>; 20°C, 10 s. The chicken *BCRP* and *MRP4* qPCR primers are shown in Table 1.

122 *Western Blotting*

123 Total protein was extracted from liver, kidney, jejunum, and ileum (100 mg) for western  
124 blotting analysis of BCRP, MRP4 and  $\beta$ -actin. Immunoblotting was assayed using anti-BCRP  
125 (cat. no. bs-0662R, Polyclonal, 1:1000, Bioss, China), MRP4 (cat. no. bs-1422R, Polyclonal,  
126 1:1000, Bioss, China) as well as  $\beta$ -actin (cat. No. abs137975, Monoclonal, 1:1000, Absin,  
127 China) antibodies. The proteins were visualized using western blotting detection kit  
128 (Advansta, USA). The density of bands was analyzed by Image pro plus 6.0 and normalized  
129 to  $\beta$ -actin.

130 *Immunohistochemistry*

131 Tissues of liver, kidney, jejunum and ileum were fixed in 4% paraformaldehyde and  
132 paraffin-embedded sections (5  $\mu$ m thick). BCRP and MRP4 protein expression were  
133 detection by immunohistochemistry as described by Liu et al [14]. The primary antibodies  
134 were used in this study: anti-BCRP (1:400) and anti-MRP4 (1:300). And the secondary  
135 antibody was used Goat anti-rabbit IgG(cat. no. AP132P, 1:1,000, Millipore, USA). Finally  
136 the immunolabeled sections were observed under a light microscope and taken photos.

137 *Statistical Analysis*

138 Statistical analysis was used by IBM SPSS Statistics Version19 (SPSS). Data were

139 expressed as mean  $\pm$  standard error of mean (s.e.m.). One-way analysis of variance with  
140 SPSS, Duncan multiple comparison, and  $P < 0.05$  was statistically significant.

141

## 142 **Results**

### 143 *Renal function*

144 As shown in Table 2, compared with the control group, serum uric acid levels were higher  
145 ( $p = 0.01$ ) and creatinine and BUN levels were significantly higher ( $p < 0.01$ ) in the  
146 sulfonamide-treated drinking water (SD) group. Serum uric acid, creatinine, and BUN levels  
147 were significantly higher in the intraperitoneal injection of uric acid (IU) group than in the  
148 control group ( $p < 0.01$ ); however, there was no significant difference between the diet  
149 supplemented with fishmeal (FM) group and the control group.

### 150 *BCRP and MRP4 mRNA and protein expression in normal chickens*

151 Real-time quantitative PCR and western blotting were used to detect the distributions of  
152 BCRP and MRP4 in the liver, kidneys, jejunum, and ileum of normal chickens (Fig. 1). The  
153 results showed that chicken BCRP (Fig. 1A) was highly expressed in the jejunum and ileum  
154 ( $p < 0.01$ ), lowly expressed in the liver, and minimally expressed in the kidneys ( $p < 0.01$ ).  
155 MRP4 expression was similar to that of BCRP (Fig. 1B); its expression levels in the liver and  
156 kidneys were lower than in the jejunum and ileum ( $p < 0.01$ ), but did not differ significantly  
157 between the liver and kidneys. In addition, relative expression analyses showed that BCRP  
158 and MRP4 were mainly expressed in the jejunum and ileum. BCRP levels were higher than  
159 MRP4 levels in the jejunum, ileum, and liver and BCRP and MRP4 levels did not differ  
160 significantly in the kidneys (Fig. 1C).

161 Immunohistochemical staining showed that BCRP and MRP4 were expressed in the liver  
162 cells, renal apical membrane, intestinal smooth muscle, and intestinal villi (Fig. 2 and Fig. 3).  
163 Moreover, MRP4 levels in these four tissues were lower than BCRP levels.

### 164 *BCRP and MRP4 expression in various treatment groups*

165 BCRP and MRP4 mRNA levels in the liver, kidneys, jejunum, and ileum of chickens in  
166 each treatment group were evaluated by qPCR. BCRP and MRP4 levels showed similar  
167 trends. As shown in Fig. 4, compared with the control group, BCRP and MRP4 levels were

168 significantly higher ( $p < 0.05$ ,  $p < 0.01$ ) in the ileum and slightly higher in the kidneys of the  
169 SD group. BCRP and MRP4 levels were significantly increased in the kidneys and ileum of  
170 the IU group. Additionally, in the SD and IU groups, BCRP and MRP4 expression levels  
171 were significantly decreased in the liver ( $p < 0.05$ ,  $p < 0.05$ ). In the FM group, BCRP and  
172 MRP4 expression levels in the kidneys were significantly increased ( $p < 0.05$ ,  $p < 0.05$ ), the  
173 levels in the ileum were slightly increased, and there was no obvious difference in the liver.  
174 Moreover, BCRP and MRP4 expression levels in the jejunum of the three experimental  
175 groups showed a decreasing trend, though the difference was not significant.

176 Western blotting results showed that BCRP and MRP4 expression levels in the liver,  
177 kidneys, jejunum, and ileum of each group were consistent with the mRNA expression levels  
178 (Fig. 5). In the SD group, BCRP and MRP4 protein levels were slightly increased in the  
179 kidneys and significantly increased in the ileum ( $p < 0.05$ ,  $p < 0.01$ ). In the IU group, BCRP  
180 and MRP4 protein levels were significantly increased in the kidneys and ileum. In the SD and  
181 IU groups, BCRP and MRP4 levels were decreased in the liver. In the FM group, BCRP and  
182 MRP4 protein levels were significantly increased in the kidneys ( $p < 0.01$ ,  $p < 0.05$ ) and  
183 slightly increased in the ileum, while there was no significant difference in the liver levels  
184 compared to the control group. BCRP and MRP4 protein levels in the jejunum of the three  
185 experimental groups did not differ significantly.

186 Finally, we used immunohistochemistry to evaluate BCRP and MRP4 protein expression  
187 levels in the liver, kidneys, jejunum, and ileum in each treatment group. As shown in Fig. 6  
188 and Fig. 7, BCRP and MRP4 were more highly expressed in the kidneys and ileum of the  
189 three experimental groups than in the control group, whereas jejunum BCRP and MRP4  
190 levels were similar to those of the control group. Liver BCRP and MRP4 protein expression  
191 levels were lower in the SD and IU groups than in the control group, while in the FM group,  
192 liver expression levels were similar to those in the control group.

193

## 194 **Dissussion**

195 BCRP and MRP4 are uric acid transporters present in various organs, such as the human  
196 liver, kidneys, and intestines, which can be expressed in heterogeneous systems for uric acid  
197 transport [8, 31, 33]. BCRP and MRP4 are involved in human and mouse uric acid excretion



198 and in vitro studies have revealed that BCRP and MRP4 are expressed in cPTCs [2].  
199 However, their roles in the chicken uric acid transport system remain unclear. The results of  
200 this study showed that BCRP and MRP4 are highly expressed in the jejunum and ileum of  
201 chickens, with low expression in the liver and kidney and minimal expression of BCRP in the  
202 kidneys. Several BCRP localization studies have reported relatively high expression in rat  
203 and mouse kidneys as well as in the small intestine, especially in the ileum [29], while in  
204 humans, the apical membrane of hepatocytes, colonic epithelial cells, and placental  
205 syncytium trophoblasts exhibit relatively high expression [7, 18]. MRP4 is most highly  
206 expressed in the human kidneys, followed by the liver and intestines [10]. However, in mice,  
207 MRP4 levels are significantly higher in the kidneys than in the liver and intestines, and  
208 female liver and kidney expression levels are significantly higher than in male mice [17].  
209 These results indicate that although BCRP and MRP4 can be expressed heterologously, their  
210 tissue distributions differ among species and these differences may be related to  
211 species-specific mechanisms of uric acid metabolism. Previous studies have shown that  
212 endogenous uric acid in mice is secreted directly from the blood into the intestinal lumen of  
213 all bowel segments [36, 38]. Ileum secretion is approximately 3-fold and 2-fold higher than  
214 jejunum and colon secretion, respectively [11]. These findings indicate that the mouse ileum  
215 is the main site of intestinal uric acid secretion [38]. The results of this study demonstrate that  
216 chicken BCRP and MRP4 are mainly expressed in the jejunum and ileum, with higher  
217 expression in the ileum; accordingly, the roles of BCRP and MRP4 in ileum uric acid  
218 excretion may be particularly important.

219 The kidney has been recognized as the main regulator of serum uric acid and the excretion  
220 of renal uric acid is determined by the balance of urate reabsorption and re-secretion [5]. In  
221 humans, approximately 70% of uric is secreted into the urine through the renal tubules [16].  
222 BCRP and MRP4 are critical for uric acid secretion in human and mouse kidneys [28]. A  
223 high-protein diet can increase chicken serum uric acid levels [9]. However, in this study, the  
224 high-protein diet FM group did not demonstrate an increase in serum uric acid, creatinine, or  
225 BUN levels, while renal BCRP and MRP4 expression increased significantly and ileum  
226 expression increased slightly. These findings indicate that when renal function is normal, the  
227 kidney is the main site of uric acid clearance and that renal BCRP and MRP4 are involved in

228 renal uric acid excretion.

229 In this study, serum uric acid, creatinine, and BUN levels were significantly increased in  
230 the SD and IU groups compared with the control group. In the SD group, sulfonamide  
231 crystallization may have blocked the renal tubules and caused renal damage [20], thereby  
232 reducing uric acid excretion and increasing serum uric acid. In the IU group, intraperitoneal  
233 injection of uric acid not only raised serum uric acid levels, but also caused renal damage [6,  
234 26]. Mouse studies have shown that the ileum plays an important role in ileum uric acid  
235 clearance during kidney injury [21, 37]. Similarly, our results showed that chicken serum uric  
236 acid increased when serum creatinine and BUN levels were elevated in the SD and IU groups.  
237 In addition, ileum BCRP and MRP4 protein and gene expression levels were significantly  
238 increased. These results suggest that chicken kidney and intestine BCRP and MRP4 are  
239 involved in uric acid clearance and that when kidney function is impaired, uric acid excretion  
240 in the ileum can provide a compensatory mechanism by increasing BCRP and MRP4  
241 expression. In addition, BCRP and MRP4 levels in the jejunum were slightly lower in the  
242 three experimental groups compared with expression in the control group. The mechanisms  
243 underlying these differences should be evaluated in future studies.

244 Serum uric acid levels in the SD and IU groups were significantly higher than those in the  
245 control group, while liver BCRP and MRP4 expression levels were significantly lower. In  
246 addition, serum uric acid levels in the FM group were decreased and liver BCRP and MRP4  
247 expression levels were slightly increased. These results indicate that changes in liver BCRP  
248 and MRP4 expression contradict the changes in serum uric acid levels. Previous studies have  
249 shown that BCRP and MRP4 are expressed as uric acid efflux proteins in the basolateral  
250 membrane of hepatocytes [25]. In this study, immunohistochemical staining showed that  
251 BCRP and MRP4 were also expressed in blood vessels, indicating that they may participate  
252 in liver uric acid entry into the blood circulation. The decrease in liver BCRP and MRP4  
253 expression with increasing serum uric acid levels may reduce serum uric acid levels.

254 Several studies have proposed a “Remote Sensing and Signaling Hypothesis” [1, 22, 34],  
255 suggesting that some uric transporters, such as BCRP and MRP4, present in different tissues  
256 are part of an inter-organ and inter-organismal communication network that maintains uric  
257 acid levels in the case of kidney or other organ injury [4]. Our study supports the hypothesis

258 that the uric acid transporters BCRP and MRP4 are involved in the regulation of serum uric  
259 acid levels in the liver, kidneys, and intestines.

260 This study had some limitations; the mechanisms underlying the interaction between  
261 changes in serum uric acid levels and liver, kidney, and intestinal BCRP and MRP4 levels  
262 remain unclear. In addition, an interaction between BCRP and MRP4 may exist and further  
263 studies are needed to evaluate this.

264

## 265 **Conclusions**

266 Our results show that chicken BCRP and MRP4 participate in renal and intestinal uric acid  
267 excretion. When renal function is impaired, BCRP and MRP4 expression in the kidneys and  
268 ileum exhibit compensatory increases; however, when renal function is normal, changes in  
269 serum uric acid levels have no effect on ileum BCRP and MRP4 levels. Importantly,  
270 inter-organ communication between uric transporters in different tissues during uric  
271 regulation remains unclear and this coordination should be investigated in future studies.

272

## 273 **Acknowledgments**

274 We are grateful to the animal hospital of Anhui Agricultural University. We wish to thank  
275 anonymous reviewers for their kind advice.

## 276 **Competing Interests**

277 No conflicts of interest are declared by the authors.

## 278 **Funding**

279 This work was supported by grants from the National Key Research and Development  
280 Program of China (No.2016YFD0501205) and the Key Research and Development Program  
281 of Anhui Province of China (No.1804a07020135).

282

## 283 **References**

284

- 285 1. **Ahn SY, Nigam SK.** Toward a systems level understanding of organic anion and other multispecific drug  
286 transporters: a remote sensing and signaling hypothesis. *Mol Pharmacol* 2009, **76**, 481-490.
- 287 2. **Bataille AM, Goldmeyer J, Renfro JL.** Avian renal proximal tubule epithelium urate secretion is mediated by Mrp4.

- 288 Am J Physiol Regul Integr Comp Physiol 2008, **295**, R2024-2033.
- 289 3. **Bataille AM, Maffeo CL, Renfro JL.** Avian renal proximal tubule urate secretion is inhibited by cellular  
290 stress-induced AMP-activated protein kinase. Am J Physiol Renal Physiol 2011, **300**, F1327-1338.
- 291 4. **Bhatnagar V, Richard EL, Wu W, Nievergelt CM, Lipkowitz MS, Jeff J, Maihofer AX, Nigam SK.** Analysis of  
292 ABCG2 and other urate transporters in uric acid homeostasis in chronic kidney disease: potential role of remote  
293 sensing and signaling. Clin Kidney J 2016, **9**, 444-453.
- 294 5. **Bobulescu IA, Moe OW.** Renal transport of uric acid: evolving concepts and uncertainties. Adv Chronic Kidney Dis  
295 2012, **19**, 358-371.
- 296 6. **Braga TT, Forni ME, Correa-Costa M, Ramos RN, Barbuto JA, Branco P, Castoldi A, Hiyane MI, Davanso  
297 MR, Latz E, Franklin BS, Kowaltowski AJ, Camara NO.** Soluble Uric Acid Activates the NLRP3 Inflammasome.  
298 Sci Rep 2017, **7**, 39884.
- 299 7. **Doyle LA, Yang W, Abruzzo LV, Krogmann T, Gao Y, Rishi AK, Ross DD.** A multidrug resistance transporter  
300 from human MCF-7 breast cancer cells. Proc Natl Acad Sci U S A 1998, **95**, 15665-15670.
- 301 8. **Dudas PL, Pelis RM, Braun EJ, Renfro JL.** Transepithelial urate transport by avian renal proximal tubule  
302 epithelium in primary culture. J Exp Biol 2005, **208**, 4305-4315.
- 303 9. **Guo X, Huang K, Tang J.** Clinicopathology of gout in growing layers induced by high calcium and high protein  
304 diets. Br Poult Sci 2005, **46**, 641-646.
- 305 10. **Hilgendorf C, Ahlin G, Seithel A, Artursson P, Ungell AL, Karlsson J.** Expression of thirty-six drug transporter  
306 genes in human intestine, liver, kidney, and organotypic cell lines. Drug Metab Dispos 2007, **35**, 1333-1340.
- 307 11. **Hosomi A, Nakanishi T, Fujita T, Tamai I.** Extra-renal elimination of uric acid via intestinal efflux transporter  
308 BCRP/ABCG2. PLoS One 2012, **7**, e30456.
- 309 12. **Huls M, Brown CD, Windass AS, Sayer R, van den Heuvel JJ, Heemskerk S, Russel FG, Masereeuw R.** The  
310 breast cancer resistance protein transporter ABCG2 is expressed in the human kidney proximal tubule apical  
311 membrane. Kidney Int 2008, **73**, 220-225.
- 312 13. **Kumar R, Joshi G, Kler H, Kalra S, Kaur M, Arya R.** Toward an Understanding of Structural Insights of Xanthine  
313 and Aldehyde Oxidases: An Overview of their Inhibitors and Role in Various Diseases. Med Res Rev 2017 .
- 314 14. **Liu YW, Sun WF, Zhang XX, Li J, Zhang HH.** Compound Tufuling Granules ([characters: see text]) regulate  
315 glucose transporter 9 expression in kidney to influence serum uric acid level in hyperuricemia mice. Chin J Integr  
316 Med 2015, **21**, 823-829.
- 317 15. **Maalouf NM.** Metabolic syndrome and the genesis of uric acid stones. J Ren Nutr 2011, **21**, 128-131.
- 318 16. **Maesaka JK, Fishbane S.** Regulation of renal urate excretion: a critical review. Am J Kidney Dis 1998, **32**,  
319 917-933.
- 320 17. **Maher JM, Slitt AL, Cherrington NJ, Cheng X, Klaassen CD.** Tissue distribution and hepatic and renal ontogeny  
321 of the multidrug resistance-associated protein (Mrp) family in mice. Drug Metab Dispos 2005, **33**, 947-955.
- 322 18. **Maliepaard M, Scheffer GL, Faneyte IF, van Gastelen MA, Pijnenborg AC, Schinkel AH, van De Vijver MJ,  
323 Schepers RJ, Schellens JH.** Subcellular localization and distribution of the breast cancer resistance protein  
324 transporter in normal human tissues. Cancer Res 2001, **61**, 3458-3464.
- 325 19. **Matsuo H, Nakayama A, Sakiyama M, Chiba T, Shimizu S, Kawamura Y, Nakashima H, Nakamura T,  
326 Takada Y, Oikawa Y, Takada T, Nakaoka H, Abe J, Inoue H, Wakai K, Kawai S, Guang Y, Nakagawa H, Ito T,  
327 Niwa K, Yamamoto K, Sakurai Y, Suzuki H, Hosoya T, Ichida K, Shimizu T, Shinomiya N.** ABCG2 dysfunction  
328 causes hyperuricemia due to both renal urate underexcretion and renal urate overload. Sci Rep 2014, **4**, 3755.
- 329 20. **Mustafa S, Alsughayer A, Elgazzar A, Elassar A, Al SF.** Effect of sulfa drugs on kidney function and renal  
330 scintigraphy. Nephrology (Carlton) 2014, **19**, 210-216.
- 331 21. **Nagura M, Tamura Y, Kumagai T, Hosoyamada M, Uchida S.** Uric acid metabolism of kidney and intestine in a

- 332 rat model of chronic kidney disease. *Nucleosides Nucleotides Nucleic Acids* 2016, **35**, 550-558.
- 333 22. **Nigam SK**. What do drug transporters really do. *Nat Rev Drug Discov* 2015, **14**, 29-44.
- 334 23. **Oka Y, Tashiro H, Sirasaki R, Yamamoto T, Akiyama N, Kawasugi K, Shirafuji N, Fujimori S**. Hyperuricemia  
335 in hematologic malignancies is caused by an insufficient urinary excretion. *Nucleosides Nucleotides Nucleic Acids*  
336 2014, **33**, 434-438.
- 337 24. **Petru L, Pavelcova K, Sebesta I, Stiburkova B**. Genetic background of uric acid metabolism in a patient with  
338 severe chronic tophaceous gout. *Clin Chim Acta* 2016, **460**, 46-49.
- 339 25. **Rius M, Nies AT, Hummel-Eisenbeiss J, Jedlitschky G, Keppler D**. Cotransport of reduced glutathione with bile  
340 salts by MRP4 (ABCC4) localized to the basolateral hepatocyte membrane. *Hepatology* 2003, **38**, 374-384.
- 341 26. **Romi MM, Arfian N, Tranggono U, WAW S, DCR S**. Uric acid causes kidney injury through inducing fibroblast  
342 expansion, Endothelin-1 expression, and inflammation. *BMC Nephrol* 2017, **18**, 326.
- 343 27. **Russel FG, Koenderink JB, Masereeuw R**. Multidrug resistance protein 4 (MRP4/ABCC4): a versatile efflux  
344 transporter for drugs and signalling molecules. *Trends Pharmacol Sci* 2008, **29**, 200-207.
- 345 28. **Sakurai H**. Urate transporters in the genomic era. *Curr Opin Nephrol Hypertens* 2013, **22**, 545-550.
- 346 29. **Tanaka Y, Slitt AL, Leazer TM, Maher JM, Klaassen CD**. Tissue distribution and hormonal regulation of the  
347 breast cancer resistance protein (Bcrp/Abcg2) in rats and mice. *Biochem Biophys Res Commun* 2005, **326**, 181-187.
- 348 30. **Tsai CW, Lin SY, Kuo CC, Huang CC**. Serum Uric Acid and Progression of Kidney Disease: A Longitudinal  
349 Analysis and Mini-Review. *PLoS One* 2017, **12**, e0170393.
- 350 31. **Van Aubel RA, Smeets PH, van den Heuvel JJ, Russel FG**. Human organic anion transporter MRP4 (ABCC4) is  
351 an efflux pump for the purine end metabolite urate with multiple allosteric substrate binding sites. *Am J Physiol*  
352 *Renal Physiol* 2005, **288**, F327-333.
- 353 32. **van Aubel RA, Smeets PH, Peters JG, Bindels RJ, Russel FG**. The MRP4/ABCC4 gene encodes a novel apical  
354 organic anion transporter in human kidney proximal tubules: putative efflux pump for urinary cAMP and cGMP. *J*  
355 *Am Soc Nephrol* 2002, **13**, 595-603.
- 356 33. **Woodward OM, Kottgen A, Coresh J, Boerwinkle E, Guggino WB, Kottgen M**. Identification of a urate  
357 transporter, ABCG2, with a common functional polymorphism causing gout. *Proc Natl Acad Sci U S A* 2009, **106**,  
358 10338-10342.
- 359 34. **Wu W, Dnyanmote AV, Nigam SK**. Remote communication through solute carriers and ATP binding cassette drug  
360 transporter pathways: an update on the remote sensing and signaling hypothesis. *Mol Pharmacol* 2011, **79**, 795-805.
- 361 35. **Wu XW, Lee CC, Muzny DM, Caskey CT**. Urate oxidase: primary structure and evolutionary implications. *Proc*  
362 *Natl Acad Sci U S A* 1989, **86**, 9412-9416.
- 363 36. **Xu X, Li C, Zhou P, Jiang T**. Uric acid transporters hiding in the intestine. *Pharm Biol* 2016, **54**, 3151-3155.
- 364 37. **Yano H, Tamura Y, Kobayashi K, Tanemoto M, Uchida S**. Uric acid transporter ABCG2 is increased in the  
365 intestine of the 5/6 nephrectomy rat model of chronic kidney disease. *Clin Exp Nephrol* 2014, **18**, 50-55.
- 366 38. **Yun Y, Yin H, Gao Z, Li Y, Gao T, Duan J, Yang R, Dong X, Zhang L, Duan W**. Intestinal tract is an important  
367 organ for lowering serum uric acid in rats. *PLoS One* 2017, **12**, e0190194.
- 368 39. **Zhang M, Gao Y, Wang X, Liu W, Zhang Y, Huang G**. Comparison of the effect of high fruit and soybean  
369 products diet and standard diet interventions on serum uric acid in asymptomatic hyperuricemia adults: an open  
370 randomized controlled trial. *Int J Food Sci Nutr* 2016, **67**, 335-343.

371

372

373 **Figure Legends**

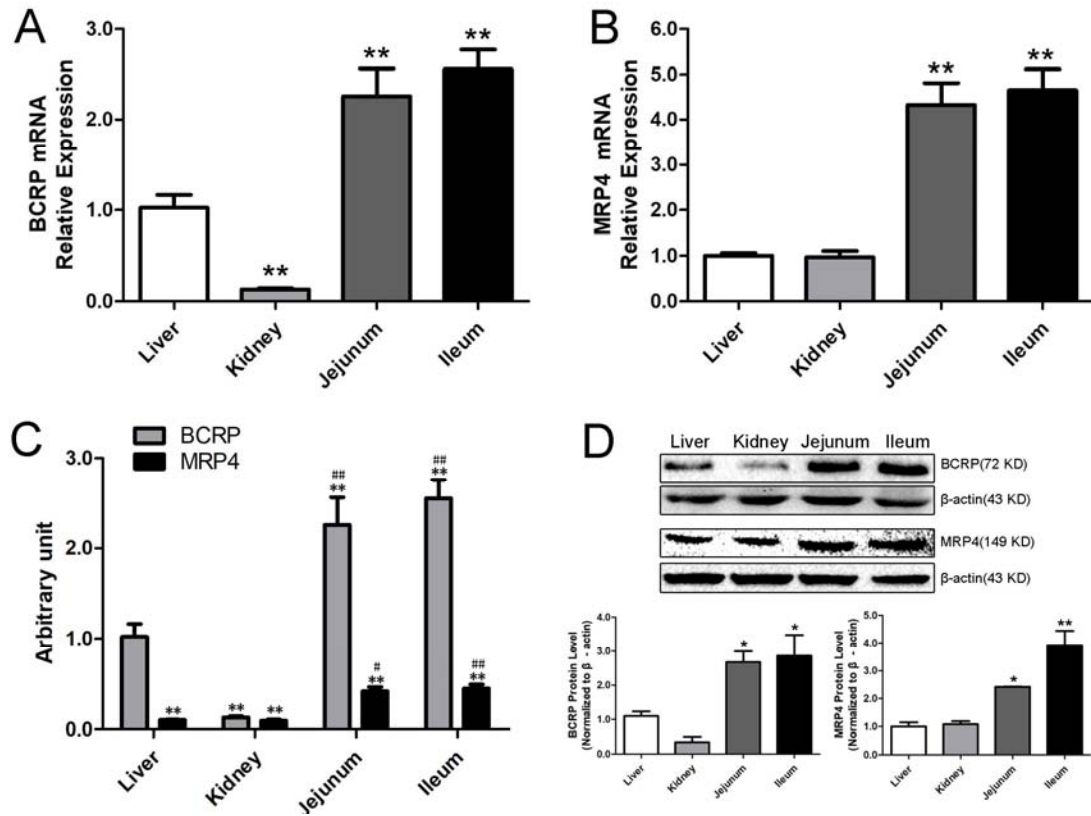

374

375 **Fig. 1: BCRP and MRP4 expression in the liver, kidneys, jejunum, and ileum of normal**  
 376 **chickens.**

377 A and B: Real-time quantitative PCR of *BCRP* and *MRP4* in the liver, kidneys, jejunum, and  
 378 ileum of normal chicken (N = 5); compared with the liver, \* $P < 0.05$ , \*\* $P < 0.01$ . C: The  
 379 relative expression of *BCRP* and *MRP4* in the liver, kidneys, jejunum, and ileum of normal  
 380 chicken (N = 5). The relative expression levels were normalized to 18S expression levels.  
 381 The expression levels of *BCRP* in the liver were set to 1. Compared with *BCRP* in the liver,  
 382 \* $P < 0.05$ , \*\* $P < 0.01$ ; compared with *MRP4* in the liver, # $P < 0.05$ , ## $P < 0.01$ . D: *BCRP* and  
 383 *MRP4* protein expression in the liver, kidneys, jejunum, and ileum of normal chickens by  
 384 western blotting (N = 3). Compared with the liver, \* $P < 0.05$ , \*\* $P < 0.01$ . All data are means  $\pm$   
 385 s.e.m.

386



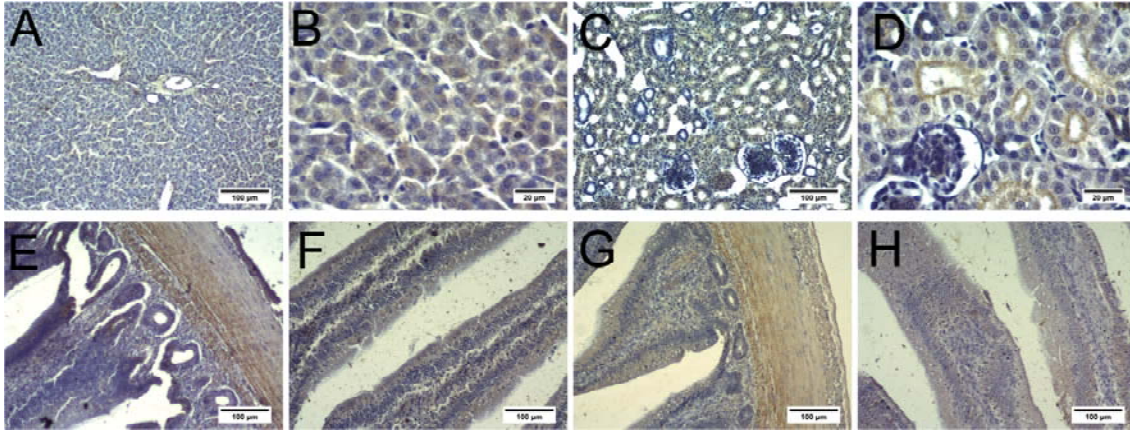

387

388 **Fig. 2: BCRP protein expression in the liver, kidneys, jejunum, and ileum of normal**  
389 **chickens, as determined by immunohistochemistry.**

390 A and B: Liver; C and D: Kidneys; E and F: Jejunum; G and H: Ileum. A, C, E, F, G, and H:  
391 scale bar = 100 μm; B and D: scale bar = 20 μm.

392

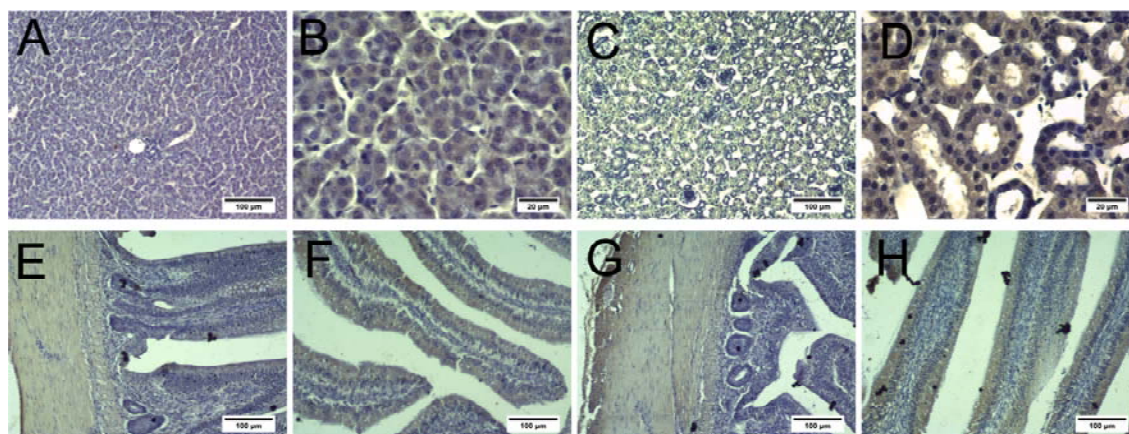

393

394 **Fig. 3: MRP4 protein expression in the liver, kidney, jejunum, and ileum of normal**  
395 **chickens, as determined by immunohistochemistry.**

396 A and B: Liver; C and D: Kidney; E and F: Jejunum; G and H: Ileum. A, C, E, F, G, and H:

397 scale bar = 100 µm; B and D: scale bar = 20 µm.

398



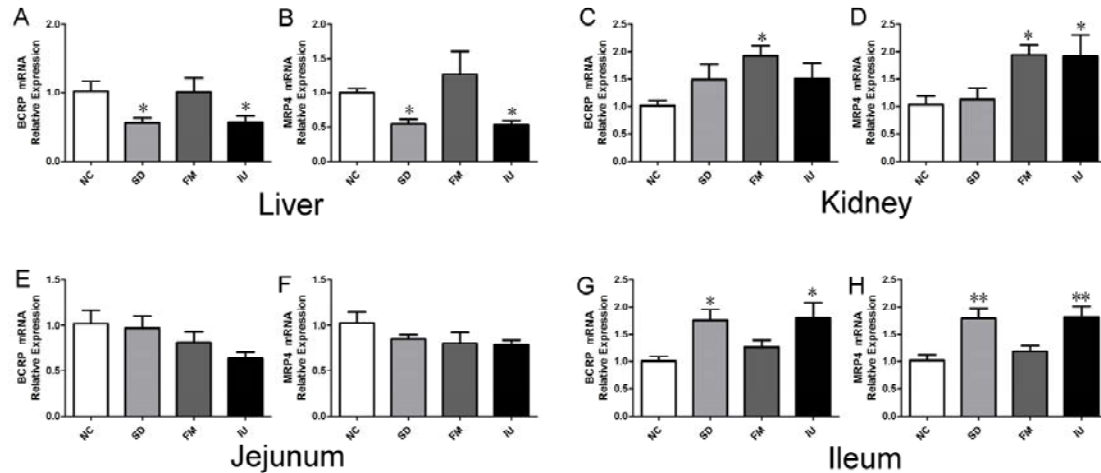

399

400 **Fig. 4: Relative BCRP and MRP4 mRNA levels in the liver, kidneys, jejunum, and ileum**  
401 **of normal chickens, as determined by real-time quantitative PCR.** Compared with the  
402 NC group, \* $P < 0.05$ , \*\* $P < 0.01$ . NC: normal control group; SD: sulfonamide group; FM: fish  
403 meal group; IU: injection uric acid group. A and B: *BCRP* and *MRP4* mRNA expression in  
404 the liver; C and D: *BCRP* and *MRP4* mRNA expression in the kidney; E and F: *BCRP* and  
405 *MRP4* mRNA expression in the jejunum; G and H: *BCRP* and *MRP4* mRNA expression in  
406 the ileum. All data are means  $\pm$  s.e.m; N = 5 samples per treatment.

407

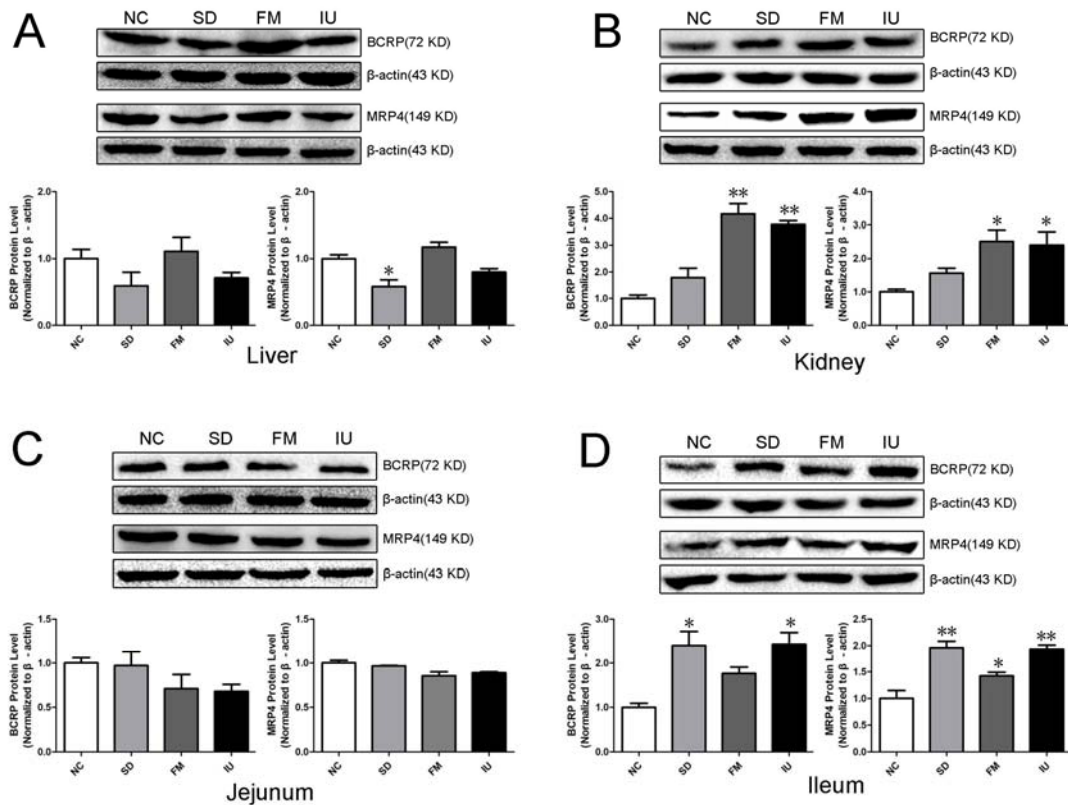

408

409 **Fig. 5: BCRP and MRP4 protein expression in the liver, kidneys, jejunum, and ileum in**

410 **each group of chickens, as determined by western blotting.**

411 Compared with the NC group, \* $P < 0.05$ , \*\* $P < 0.01$ . NC: normal control group; SD:

412 sulfonamide group; FM: fish meal group; IU: injection uric acid group. A: Protein expression

413 of BCRP and MRP4 in the liver; B: Protein expression of BCRP and MRP4 in the kidney; C:

414 Protein expression of BCRP and MRP4 in the jejunum; D: Protein expression of BCRP and

415 MRP4 in the ileum. All data are means  $\pm$  s.e.m; N = 3 samples per treatment.

416

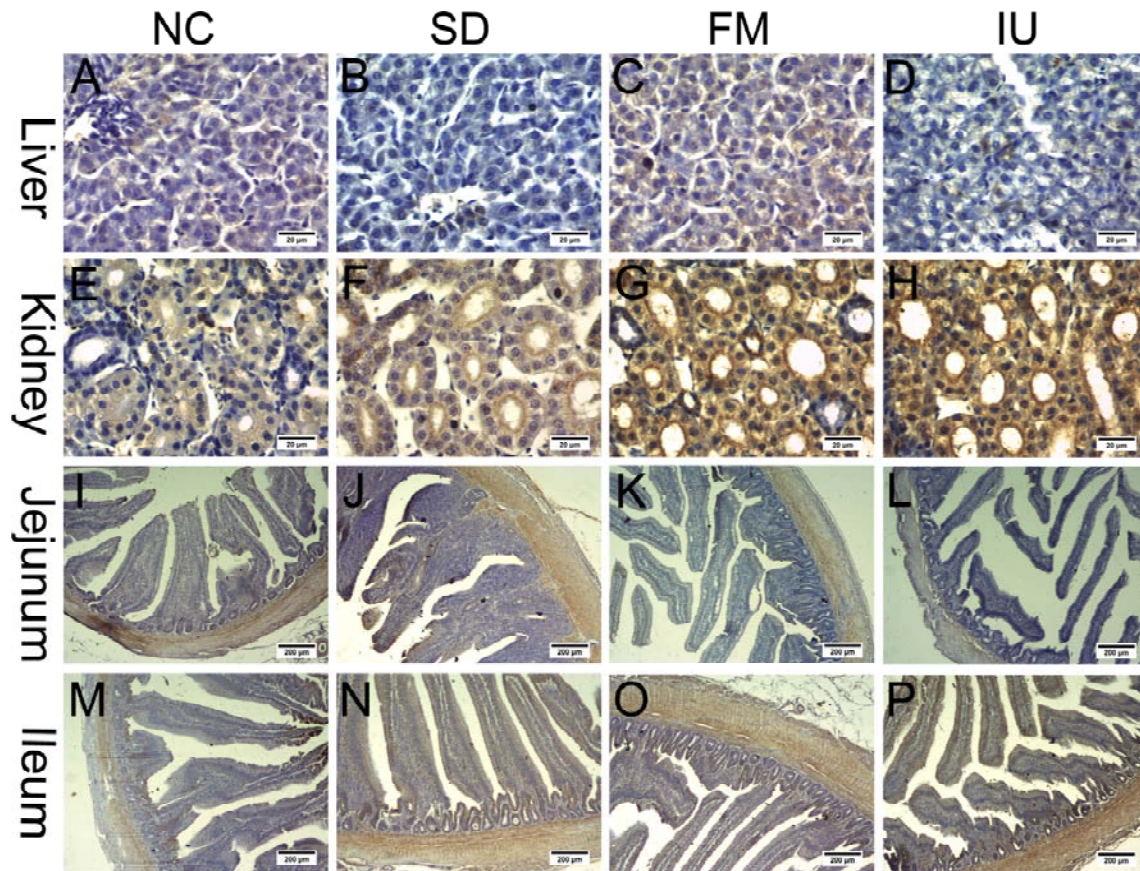

417

418 **Fig. 6. BCRP protein expression in the liver, kidneys, jejunum, and ileum in each group**  
419 **of chickens based on immunohistochemistry.**

420 NC: normal control group; SD: sulfonamide group; FM: fish meal group; IU: injection uric  
421 acid group. A to H: scale bar = 20 μm; I to P: scale bar = 200 μm.

422



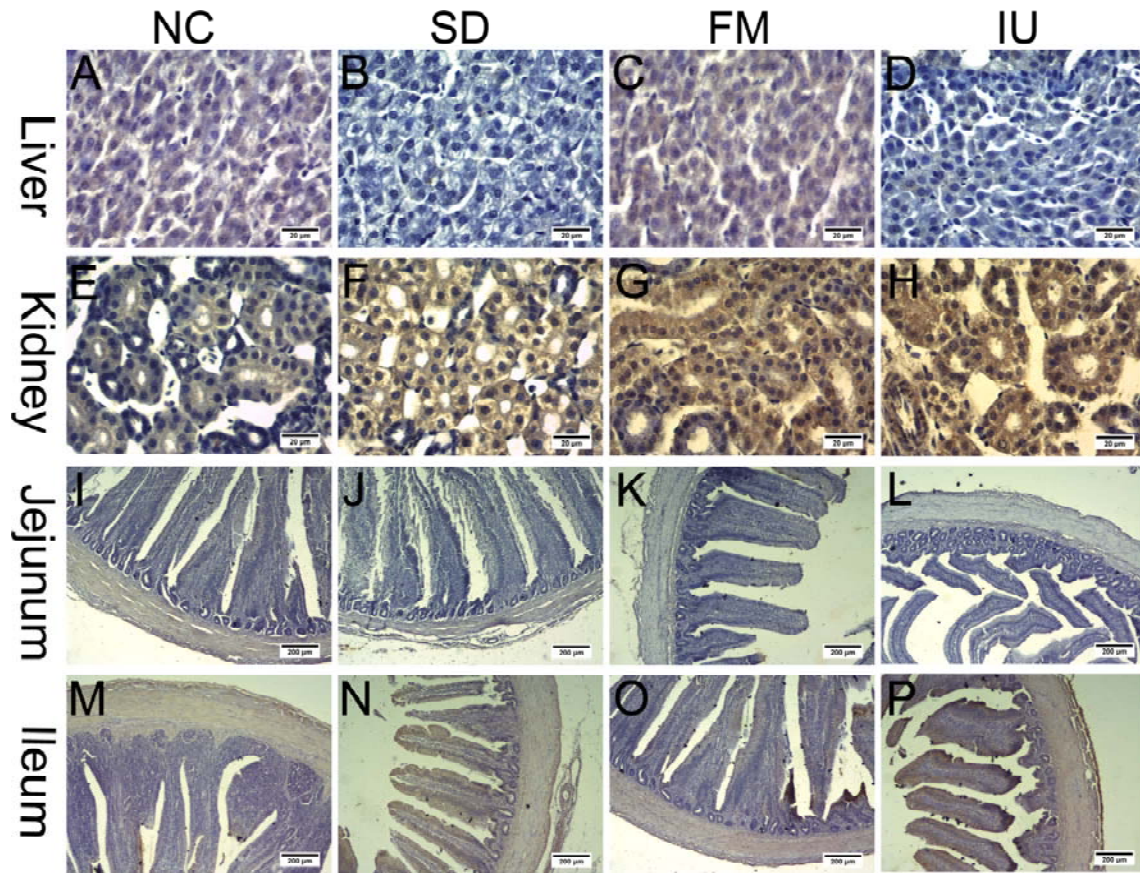

423

424 **Fig. 7. MRP4 protein expression in the liver, kidney, jejunum, and ileum in each group**

425 **of chickens based on immunohistochemistry.**

426 SD: sulfonamide group; FM: fish meal group; IU: injection uric acid group. A to H: scale bar

427 = 20  $\mu$ m; I to P: scale bar = 200  $\mu$ m.

428

429 **Tables**

430 **Table 1. Real-Time Quantitative PCR Primer Sequence**

| Gene   | Primer Sequence (5'-3')  | Length | Accession No.  |
|--------|--------------------------|--------|----------------|
| BCRP-F | CAGCAAGCAAGGAAGATCAC     | 129 bp | NM_001328490.1 |
| BCRP-R | GGCTGGAGTTGAGATACTTC     |        |                |
| MRP4-F | TAGTGTTGGTCAGAGACAGC     | 167 bp | NM_001030819.1 |
| MRP4-R | GTGCAATGGTCAGAACTGTG     |        |                |
| 18S-F  | CGGCGACGACCCATTCGAAC     | 99bp   | M_59389.1      |
| 18S-R  | GAATCGAACCCCTGATTCCCCGTC |        |                |

431 **Table 2. Serum uric acid levels and renal function in each treatment group**

| Groups | Uric ( $\mu\text{mol/L}$ ) | Creatinine ( $\mu\text{mol/L}$ ) | Bun ( $\text{mmol/L}$ ) |
|--------|----------------------------|----------------------------------|-------------------------|
| NC     | 115.7 $\pm$ 7.3            | 2.79 $\pm$ 0.14                  | 0.22 $\pm$ 0.01         |
| SD     | 141.7 $\pm$ 6.2*           | 3.66 $\pm$ 0.24**                | 0.33 $\pm$ 0.03**       |
| FM     | 112.9 $\pm$ 7.8            | 2.97 $\pm$ 0.15                  | 0.22 $\pm$ 0.02         |
| IU     | 152.9 $\pm$ 6.1**          | 3.79 $\pm$ 0.19**                | 0.28 $\pm$ 0.01**       |

432 Compared with the NC group, \* $P < 0.05$ , \*\* $P < 0.01$ . NC: normal control group; SD:  
433 sulfonamide group; FM: fish meal group; IU: injection uric acid group. All data are means  $\pm$   
434 s.e.m; N = 10 samples per treatment.
